# Supplementary material for: High-Resolution Inhibition Profiling Combined with HPLC-HRMS-SPE-NMR for Identification of PTP1B Inhibitors from Vietnamese Plants
Source: Molecules. 2017 Jul 20;22(7):1228. doi: 10.3390/molecules22071228 (PMC6152321; doi:10.3390/molecules22071228)

*Supplementary data for*

# **High-Resolution Inhibition Profiling Combined with HPLC-HRMS-SPE-NMR for Identification of PTP1B Inhibitors from Vietnamese Plants Used for the Treatment of Type 2 Diabetes**

**Binh T. D. Trinh, Anna K. Jäger\* and Dan Staerk**

Department of Drug Design and Pharmacology, Faculty of Health and Medical Sciences, University of Copenhagen, Universitetsparken 2, DK-2100 Copenhagen, Denmark

\* Correspondence: [anna.jager@sund.ku.dk](mailto:anna.jager@sund.ku.dk) ; Tel.: +45-35336339

**Figure S1** – Dose-response curves of active EtOAc extracts in PTP1B assay. Each point represents the average of triplicate measurements.

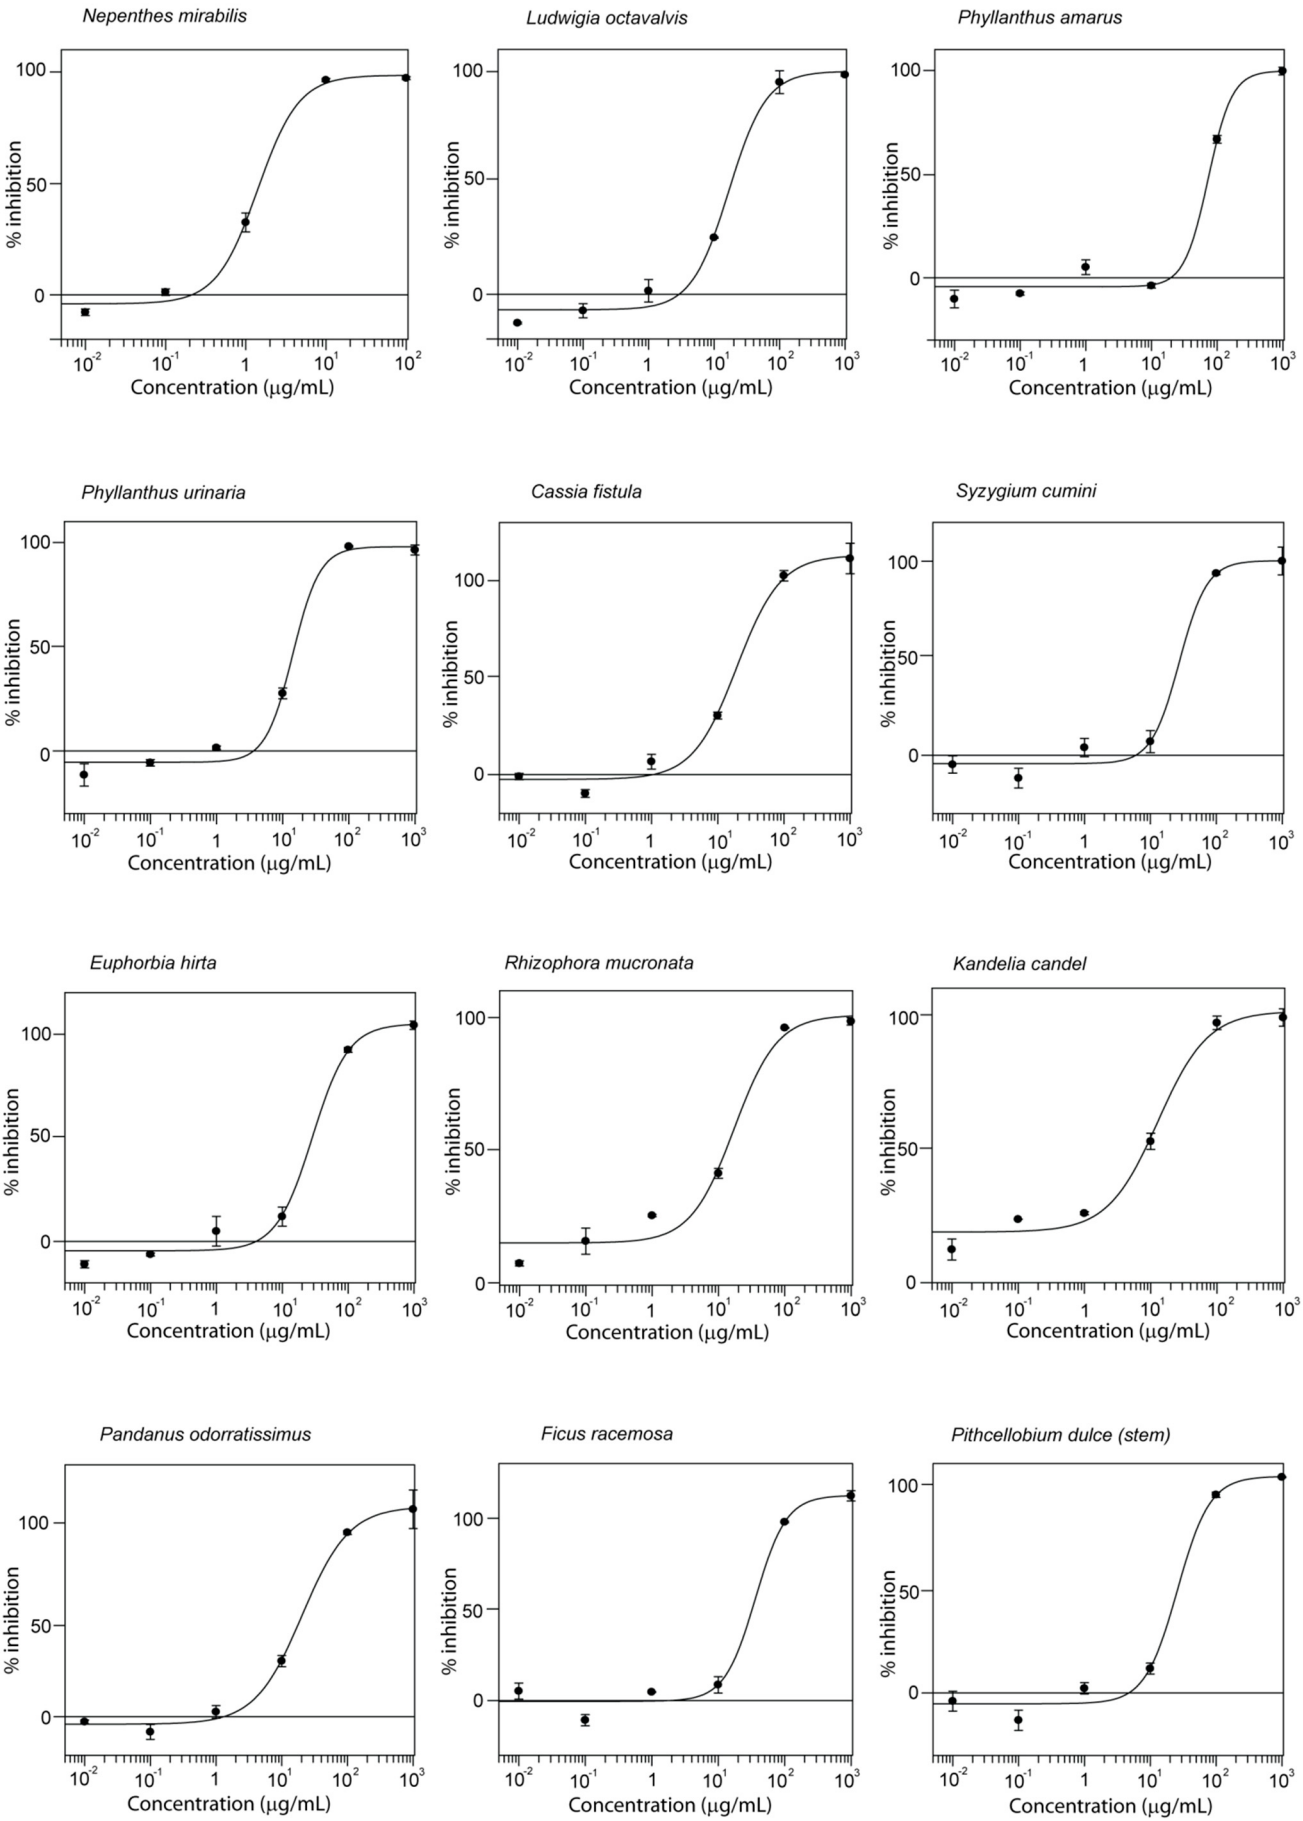

**Figure S2** – Dose-response curves of active *n*-BuOH extracts in PTP1B assay. Each point represents the average of triplicate measurements.

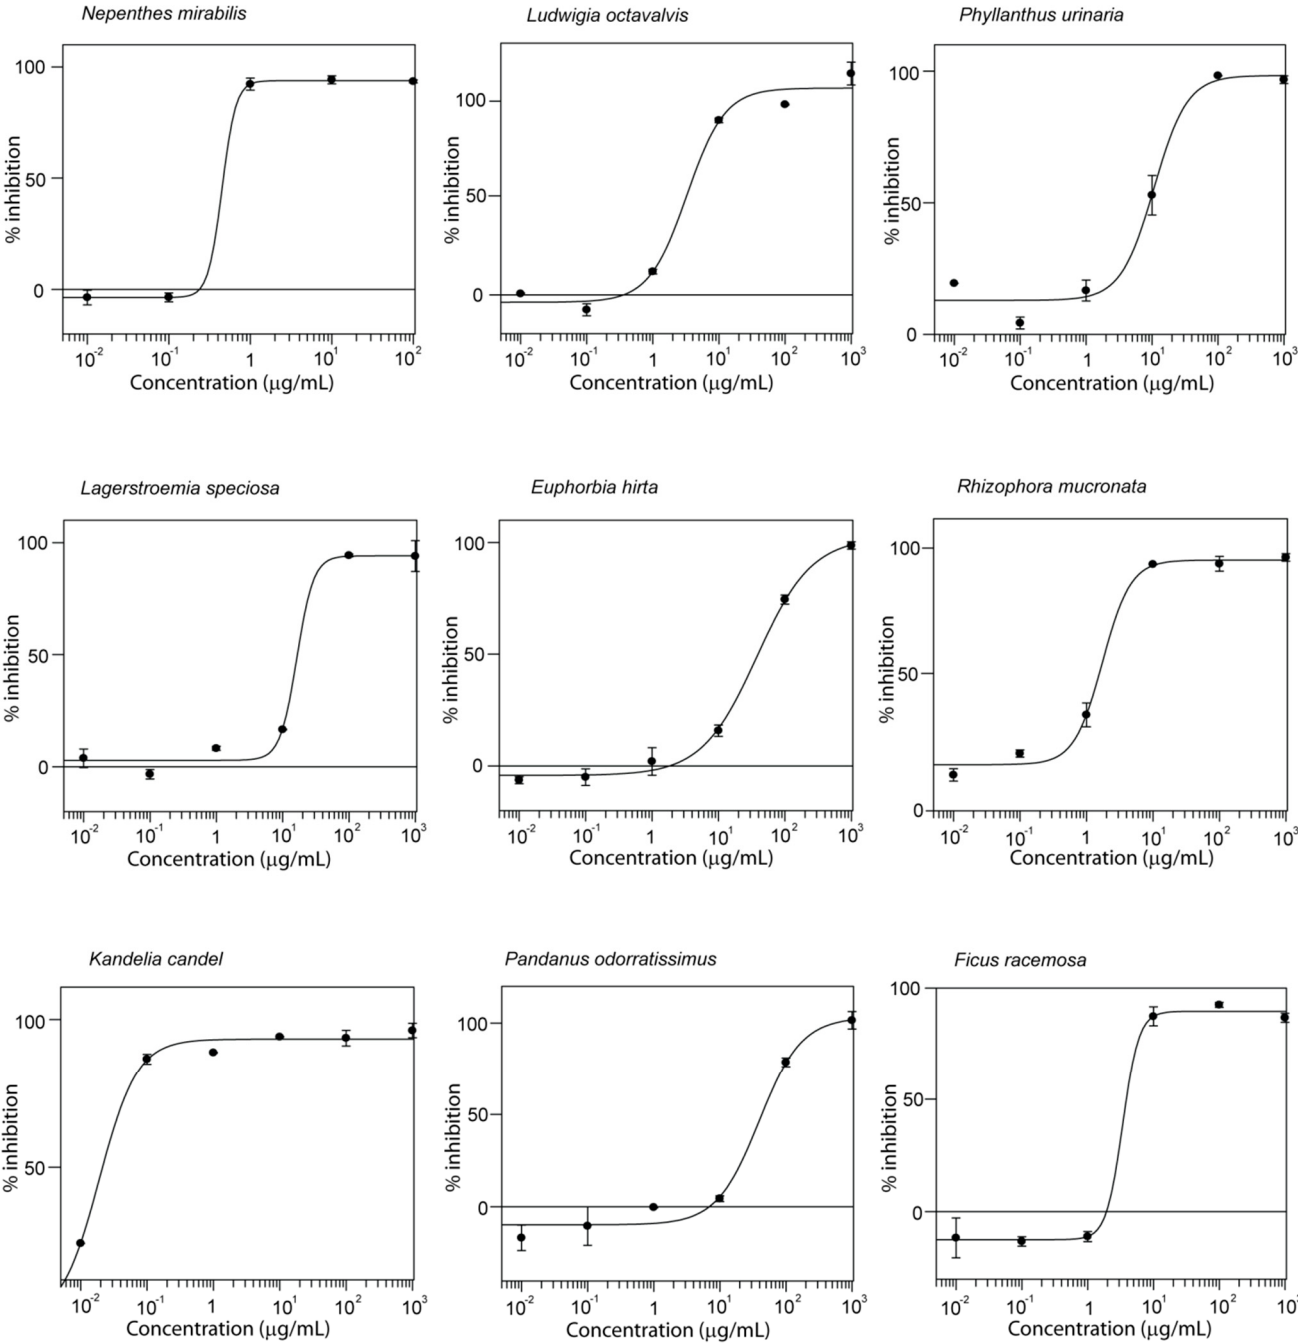

**Figure S3** – UV chromatograms monitored at 254 nm of active EtOAc extracts in PTP1B assay.

*Nepenthes mirabilis*

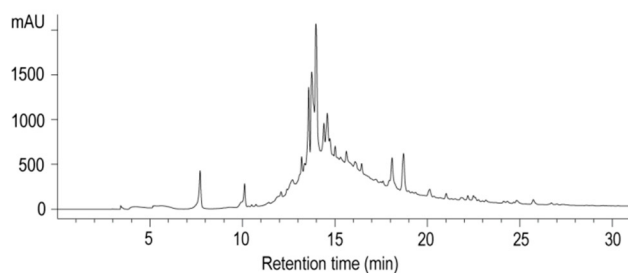

*Ludwigia octovalvis*

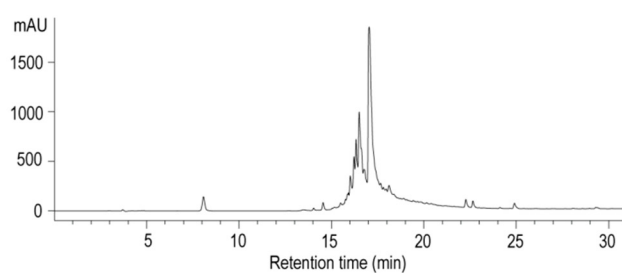

*Phyllanthus amarus*

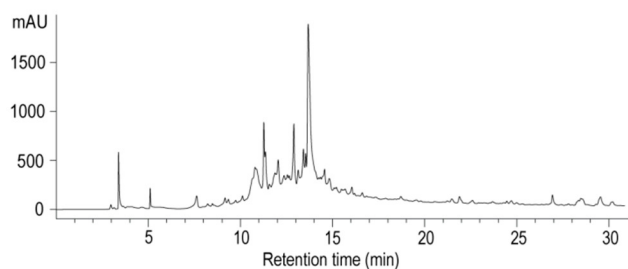

*Phyllanthus urinaria*

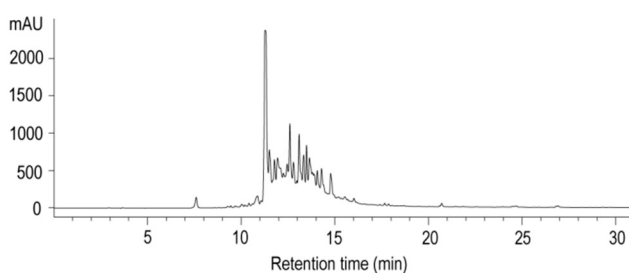

*Cassia fistula*

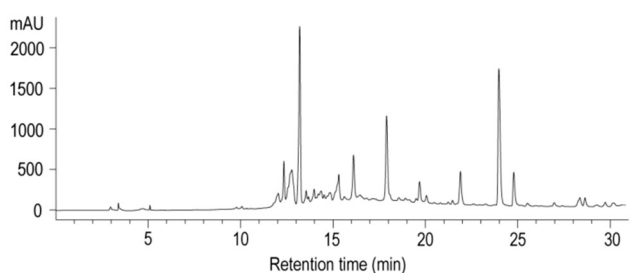

*Syzygium cumini*

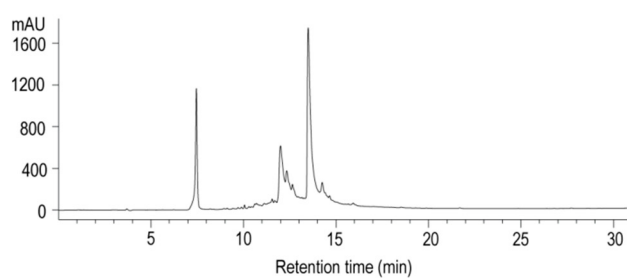

*Euphorbia hirta*

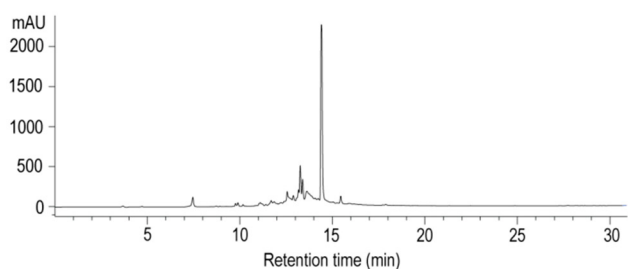

*Rhizophora mucronata*

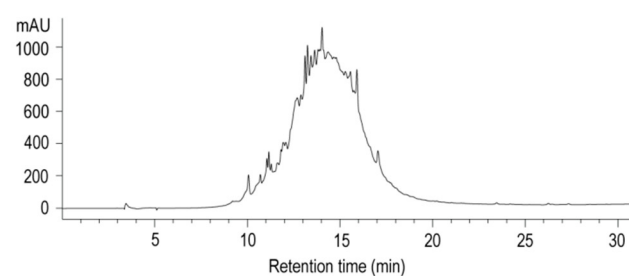

*Kandelia candel*

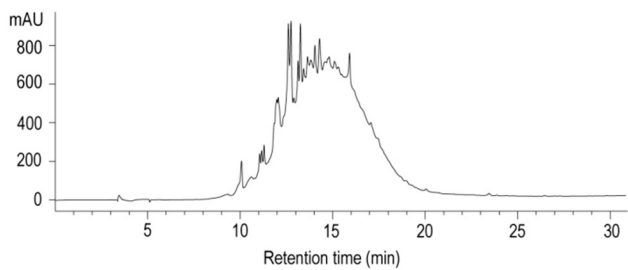

*Pandanus odoratissimus*

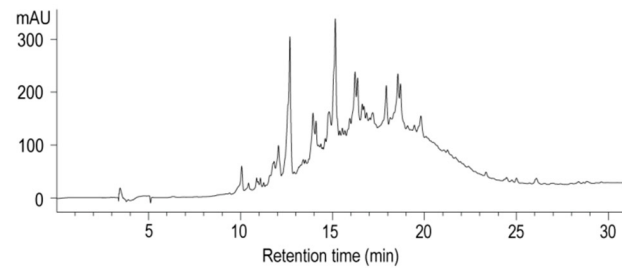

*Ficus racemosa*

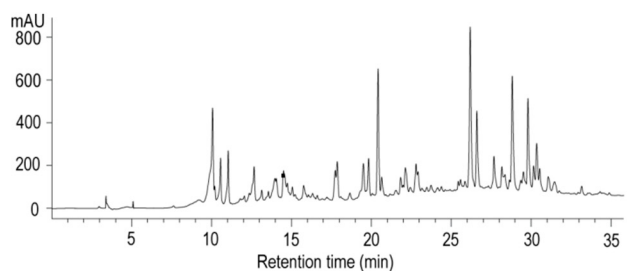

*Pithecellobium dulce (stem)*

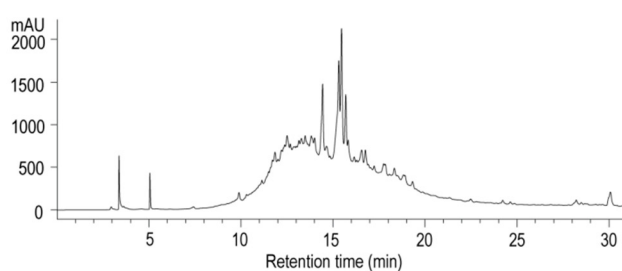

**Figure S4** – UV chromatograms monitored at 254 nm of active *n*-BuOH extracts in PTP1B assay.

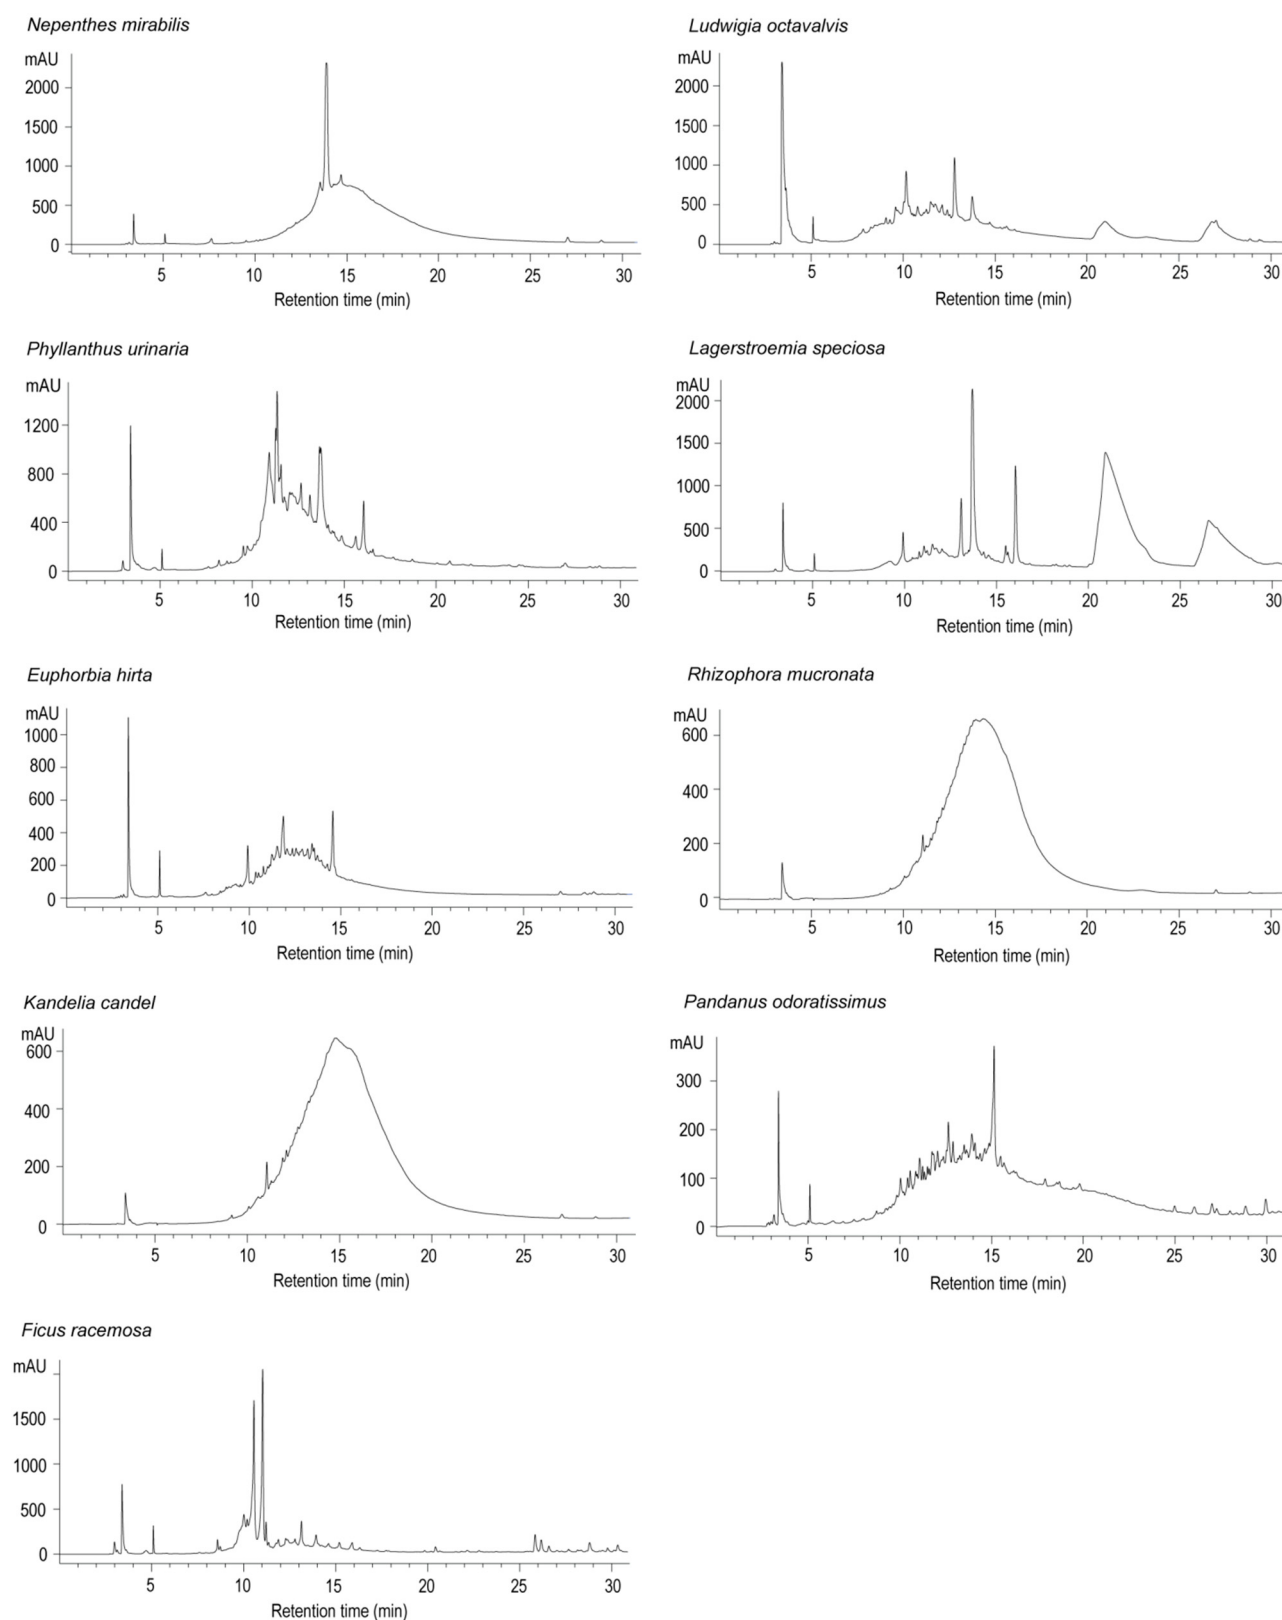

**Figure S5** – HPLC trace at 254 nm and high-resolution PTP1B inhibition profile of selected active extracts.

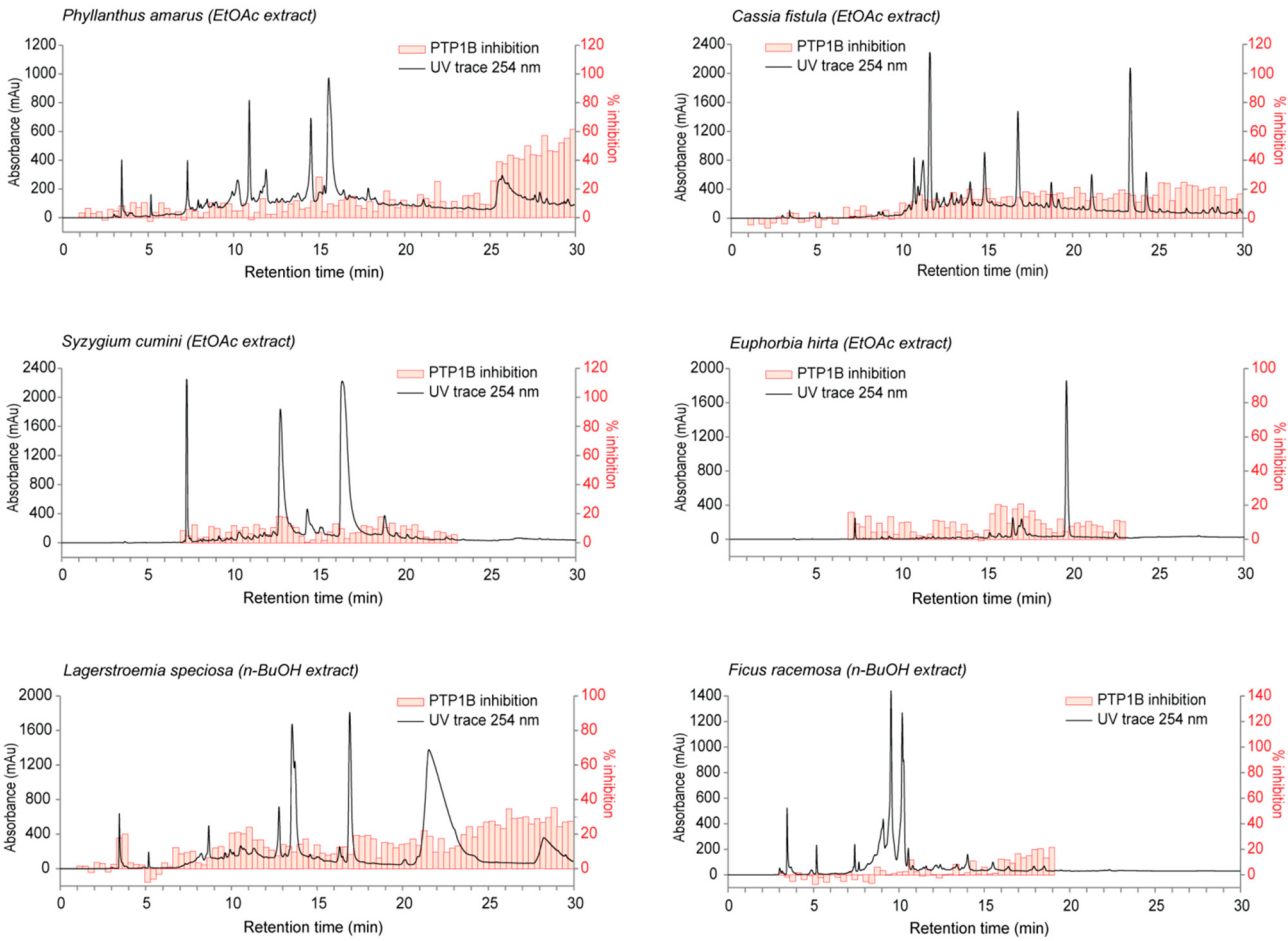

Supplement: Supplementary file 1 [file molecules-22-01228-s001.pdf]
